1 **Pyrite formation from FeS and H<sub>2</sub>S is mediated by a novel type of microbial energy**  
2 **metabolism**

3

4 Joana Thiel<sup>1</sup>, James Byrne<sup>2</sup>, Andreas Kappler<sup>2</sup>, Bernhard Schink<sup>1</sup>, Michael Pester<sup>1,3</sup>

5

6 <sup>1</sup> *University of Konstanz, Universitätsstraße 10, 78464 Konstanz, Germany*

7 <sup>2</sup> *Eberhardt Karls University of Tübingen, Hölderlinstraße 12, 72074 Tübingen, Germany*

8 <sup>3</sup> *Leibniz Institute DSMZ – German Culture Collection for Microorganisms and Cell Cultures,*  
9 *Inhoffenstraße 7B, 38124 Braunschweig, Germany*

10

11

12 Short title: Microbial pyrite formation

13

14 Keywords: Sulfur cycle | Iron-sulfur minerals | biogenic mineral transformation | syntrophy |  
15 deep biosphere | Origin of Life

16

17

18

19 Corresponding author: Michael Pester

20 Mail: Michael.Pester@dsmz.de

21 Phone: +49 531 2616237

22 Fax: +49 531 2616418

## Microbial pyrite formation

### 23 Abstract

24 The exergonic reaction of FeS with H<sub>2</sub>S to form FeS<sub>2</sub> (pyrite) and H<sub>2</sub> was postulated to have  
25 operated as an early form of energy metabolism on primordial Earth. Since the Archean,  
26 sedimentary pyrite formation played a major role in the global iron and sulfur cycles, with direct  
27 impact on the redox chemistry of the atmosphere. To date, pyrite formation was considered a  
28 purely geochemical reaction. Here, we present microbial enrichment cultures, which grew with  
29 FeS, H<sub>2</sub>S, and CO<sub>2</sub> as their sole substrates to produce FeS<sub>2</sub> and CH<sub>4</sub>. Cultures grew over  
30 periods of three to eight months to cell densities of up to 2–9×10<sup>6</sup> cells mL<sup>-1</sup>. Transformation of  
31 FeS with H<sub>2</sub>S to FeS<sub>2</sub> was followed by <sup>57</sup>Fe Mössbauer spectroscopy and showed a clear  
32 biological temperature profile with maximum activity at 28°C and decreasing activities towards  
33 4°C and 60°C. CH<sub>4</sub> was formed concomitantly with FeS<sub>2</sub> and exhibited the same temperature  
34 dependence. Addition of either penicillin or 2-bromoethanesulfonate inhibited both FeS<sub>2</sub> and  
35 CH<sub>4</sub> production, indicating a syntrophic coupling of pyrite formation to methanogenesis. This  
36 hypothesis was supported by a 16S rRNA gene-based phylogenetic analysis, which identified  
37 at least one archaeal and five bacterial species. The archaeon was closely related to the  
38 hydrogenotrophic methanogen *Methanospirillum stamsii* while the bacteria were most closely  
39 related to sulfate-reducing *Deltaproteobacteria*, as well as uncultured *Firmicutes* and  
40 *Actinobacteria*. We identified a novel type of microbial metabolism able to conserve energy  
41 from FeS transformation to FeS<sub>2</sub>, which may serve as a model for a postulated primordial iron-  
42 sulfur world.

## Microbial pyrite formation

### 43 Significance statement

44 Pyrite is the most abundant iron-sulfur mineral in sediments. Over geological times, its burial  
45 controlled oxygen levels in the atmosphere and sulfate concentrations in seawater. Its  
46 formation in sediments is so far considered a purely geochemical process that is at most  
47 indirectly supported by microbial activity. We show that lithotrophic microorganisms can directly  
48 transform FeS and H<sub>2</sub>S to FeS<sub>2</sub> and use this exergonic reaction as a novel form of energy  
49 metabolism that is syntrophically coupled to methanogenesis. Our results provide insights into  
50 a syntrophic relationship that could sustain part of the deep biosphere and lend support to the  
51 iron-sulfur-world theory that postulated FeS transformation to FeS<sub>2</sub> as a key energy-delivering  
52 reaction for life to emerge.

## Microbial pyrite formation

### 53 Introduction

54 With an annual formation of at least 5 million tons, pyrite ( $\text{FeS}_2$ ) is the thermodynamically  
55 stable end product of iron compounds reacting with sulfide in reduced sediments, with the  
56 latter being produced mainly by microbial sulfate reduction. Consequently, pyrite is the most  
57 abundant iron-sulfur mineral on Earth's surface (1). Over geological times, burial of pyrite was  
58 tightly intertwined with organic matter preservation in reduced sediments (2). These massive  
59 reservoirs of reduced sulfur and carbon are being counterbalanced by the photosynthetically  
60 produced oxygen in the Earth's atmosphere (2). Despite this importance of pyrite for Earth's  
61 iron, sulfur, and carbon cycles as well as Earth's surface redox state, the mechanism of pyrite  
62 formation in natural environments is still being debated (1). Currently, two mechanisms are  
63 discussed to drive pyrite formation in sediments, which both preclude dissolution of  
64 precipitated iron(II) monosulfide ( $\text{FeS}$ ) to an aqueous  $\text{FeS}$  intermediate. In the polysulfide  
65 pathway,  $\text{FeS}_{\text{aq}}$  is attacked by nucleophilic polysulfide to form  $\text{FeS}_2$  (equ. 1). Alternatively,  
66 pyrite may form from the reaction of  $\text{FeS}_{\text{aq}}$  with  $\text{H}_2\text{S}$  (equ. 2), which is known as the  $\text{H}_2\text{S}$   
67 pathway or the Wächtershäuser reaction (1).

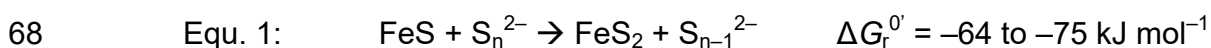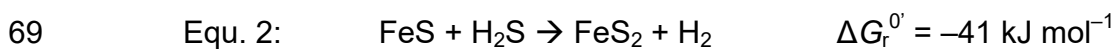

70 Using inorganic experimental systems, abiotic pyrite formation has been observed at  
71 temperatures of 25–125°C (e.g. 1, 3). However, already trace amounts of organic compounds  
72 containing aldehyde groups were reported to inhibit pyrite formation in such experiments (1, 4).  
73 Absence of stringent control for such compounds may explain why many other studies with  
74 abiotic systems did not observe pyrite formation at environmentally relevant temperatures (5-

## Microbial pyrite formation

75 11). On the other hand, pyrite formation is known to take place in the presence of organic  
76 matter and especially alive microorganisms in sediments (5, 12). Indeed, pyrite formation could  
77 be observed as a side reaction in pure and enrichment cultures of heterotrophic sulfate-  
78 reducing and chemolithotrophic sulfur-dismutating bacteria, with the assumption that these  
79 microorganisms provide mainly  $H_2S$  as a substrate for concomitant abiotic pyrite formation (13-  
80 15). In addition, a more complex involvement of microorganisms has been postulated that  
81 includes the support of nucleation of FeS minerals on bacterial cell surfaces (16). However, in  
82 all these studies biogenic pyrite formation has so far been understood only as an indirect  
83 abiotic process.

84 Pyrite formation according to equ. 2 provides reducing equivalents in the form of  $H_2$  that could  
85 be coupled to the reduction of  $CO_2$  to  $CH_4$  or more complex organic matter. Coupling of pyrite  
86 formation to methanogenesis has been proposed by Jørgensen and coworkers to be part of a  
87 cryptic sulfur cycle in deep marine sediments where it could support the enigmatic life forms of  
88 the deep biosphere (17). Coupling of this reaction to the synthesis of organic matter is the  
89 basis of the “iron-sulfur world” theory proposed by Wächtershäuser, by which pyrite formation  
90 is viewed as the central process that led to the transition from Fe-S surface-catalyzed  
91 synthesis of organic molecules to actual life on the primordial Earth (18-20). Here, we show for  
92 the first time that the reaction of FeS with  $H_2S$  to form  $FeS_2$  can be used by microorganisms to  
93 conserve energy for lithotrophic growth if syntrophically coupled to methanogenesis.

## Microbial pyrite formation

### 94 Results and Discussion

#### 95 Pyrite formation as a microbially catalyzed process

96 Mineral medium containing 5 mM FeS and 6 mM H<sub>2</sub>S as sole substrates and CO<sub>2</sub>/HCO<sub>3</sub><sup>-</sup> as  
97 carbon source was inoculated with digested sewage sludge, freshwater or marine sediment  
98 (Table S1) and incubated at 16°C or 28°C. Microbial activity was followed via methane  
99 formation, and transfers were made every three to eight months, typically when the methane  
100 content in the headspace approached a plateau. Of seven enrichments started, four exhibited  
101 methane formation for more than ten transfers. The most active enrichment culture J5, which  
102 was started from digested sewage sludge and incubated at 28°C, was characterized in more  
103 detail after more than 20 transfers. On average, the methane content reached 0.7 mmol per L  
104 of culture in J5. In contrast, no methane formation was observed in abiotic controls (Fig. 1A).  
105 This was mirrored in the turnover of total H<sub>2</sub>S: While in culture J5 total H<sub>2</sub>S decreased over  
106 time from approx. 6 mmol to 0.04–1.1 mmol per L of culture (Fig. S1), abiotic controls showed  
107 a much less pronounced decline of total H<sub>2</sub>S (3.7 mmol residual H<sub>2</sub>S per L). The observed  
108 decrease in the abiotic controls may be due to inorganic background reactions (see below).

109 Conversion of FeS solids was followed by <sup>57</sup>Fe Mössbauer spectrometry. After nearly seven  
110 months of incubation, the Mössbauer spectrum of culture J5 was dominated by a FeS<sub>2</sub> doublet  
111 (Fig. 1B), which corresponded to 53–63% of the iron-sulfur mineral phase (Table S2). In  
112 contrast, no evidence of a singlet peak corresponding to FeS was present. In addition, a poorly  
113 defined sextet feature was required to achieve a satisfactory fit of the Mössbauer spectrum.  
114 This poorly defined sextet is best described as a metastable phase, which we have termed  
115 FeS<sub>x</sub> in accordance with the notation used by Wan et al. (21), and represented 31–39% of the  
116 remaining iron-sulfur minerals. Furthermore, a well-defined sextet with a hyperfine magnetic

## Microbial pyrite formation

117 field of 32 T was required to fit the data, which corresponded well to greigite ( $\text{Fe}_3\text{S}_4$ ) (22) and  
118 made up 7–8% of the remaining iron-sulfur minerals. Greigite is the sulfur isomorph of  
119 magnetite and was previously observed as an intermediate phase in the FeS conversion to  
120 pyrite in abiotic studies (23, 24).

121  $\text{FeS}_2$  formation in culture J5 was confirmed by X-ray diffraction analysis, which recovered all  
122 major XRD reflections of pyrite in the obtained XRD pattern (Fig. 2A). Since no indication of a  
123 parallel formation of the dimorph marcasite was evident from the XRD pattern, the recovered  
124  $\text{FeS}_2$  phase is referred to as pyrite from here on. Further support for pyrite formation in culture  
125 J5 was provided by scanning electron microscopy (SEM) coupled to energy-dispersive X-ray  
126 (EDX) spectroscopy. Here,  $\mu\text{m}$ -scale iron-sulfur crystals with a euhedral structure as typical of  
127 pyrite could be observed (Fig. 2B), which resembled the expected Fe:S ratio of 1:2 as revealed  
128 by EDX point measurements (Fig. S2).

129 In contrast to culture J5, the Mössbauer spectrum of the nearly seven-months-old abiotic  
130 control was dominated by a prominent FeS singlet peak (64% of iron-sulfur minerals). In  
131 addition, a poorly defined sextet corresponding to  $\text{FeS}_x$  was required to achieve a satisfactory  
132 fit of the obtained data (36% of iron-sulfur minerals) (Fig. 1, Table S2). The abiotic conversion  
133 of FeS to  $\text{FeS}_x$  most likely explains the observed decrease of total  $\text{H}_2\text{S}$  in the abiotic control.  
134 Absence of pyrite formation in abiotic controls was further supported by the obtained XRD  
135 patterns (Fig. 2A). In addition, freshly prepared medium was also devoid of pyrite as evidenced  
136 by an overall disordered iron-sulfur mineral phase in SEM-EDX images without any euhedral  
137 crystals indicative of pyrite (Fig. 2B, Fig. S2).

138 To further support our hypothesis of biogenic pyrite formation in culture J5, we followed its iron-  
139 sulfur mineral transformation over a temperature gradient of 4–60°C. The maximum of pyrite

## Microbial pyrite formation

140 formation was evident at 28°C. Incubation at lower (16°C) or higher (46°C) temperatures  
141 resulted in decreased pyrite formation, with no pyrite formation at 4°C and 60°C (Fig. 3A and  
142 3B, Table S2). While FeS was completely transformed to pyrite, greigite, and various FeS<sub>x</sub>  
143 phases at 16, 28, and 46°C, some residual FeS remained at 4°C and 60°C (Fig. 3A). The  
144 observed temperature profile of pyrite formation is typical of biologically catalyzed reactions  
145 centered on an optimum reaction temperature. In contrast, abiotic pyrite formation at  
146 temperatures of <100°C was shown to follow a sigmoidal temperature dependence (3).

### 147 [Microbial pyrite formation is a syntrophically coupled process](#)

148 Methane formation closely followed the temperature-dependent activity profile of pyrite  
149 formation (Fig. 3C) suggesting metabolic coupling of both processes. This hypothesis was  
150 further explored in an inhibition experiment using either penicillin G as a generic inhibitor of  
151 bacterial cell wall synthesis or 2-bromoethanesulfonate (BES) as a specific inhibitor of  
152 hydrogenotrophic methanogenesis (25). BES inhibited both methane and pyrite formation  
153 completely (Fig. 1C and 1D). We interpret this as a direct coupling of biogenic pyrite formation  
154 to hydrogenotrophic methanogenesis. In support of this hypothesis, penicillin inhibited both  
155 pyrite and methane formation as well (Fig. 1C and 1D). Here, methane formation ceased after  
156 an initial production of 0.15 mmol per L of culture. The latter is explained by penicillin's mode of  
157 action, which inhibits growth of bacteria but not their initial metabolic activity. Interestingly, a  
158 corresponding small amount of pyrite was not observed in this experiment but rather a partial  
159 FeS transformation to various FeS<sub>x</sub> phases and greigite (Fig. 1D, Table S2). This indicates that  
160 methanogenesis could receive reducing equivalents also from these iron-sulfur mineral  
161 transformations. Further support for syntrophic coupling of pyrite formation to methanogenesis  
162 was provided by a third inhibition experiment in which penicillin addition was supplemented by



## Microbial pyrite formation

163 79% H<sub>2</sub> in the headspace. Also here, pyrite was not formed (Table S2) while methane  
164 production was stimulated more than 10-fold by the added H<sub>2</sub> (>10 mmol per L of culture). This  
165 clearly showed that methanogenesis could be uncoupled from pyrite formation and is essential  
166 for the latter, most likely to keep H<sub>2</sub> or another electron carrier at a low level, to make pyrite  
167 formation energetically more favorable as is typically observed in syntrophic processes (26).  
168 Although we could not identify the exact electron carrier, molecular H<sub>2</sub> is the most likely  
169 candidate because it was previously observed in abiotic experiments of pyrite formation from  
170 FeS and H<sub>2</sub>S (3, 27). Irrespective of the actual electron carrier, syntrophic coupling of pyrite  
171 formation to methanogenesis would be exergonic and result in an expected ratio of formed  
172 pyrite to methane of 4:1 (equ. 5).

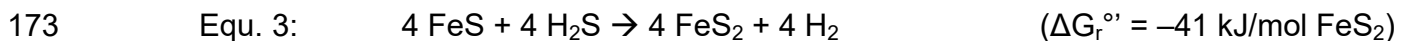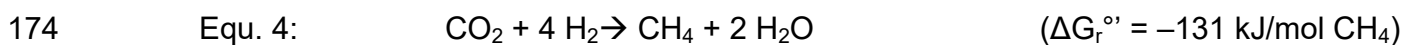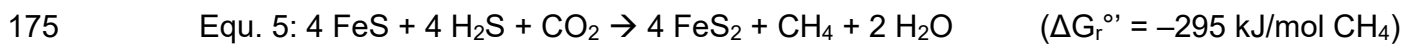

176 Indeed, the ratio of pyrite to methane formed in culture J5 was 4.1:1 and 3.2:1 in two  
177 independent experiments at 28°C (Table S2), respectively, thus confirming the proposed  
178 overall reaction stoichiometry.

### 179 Exergonic pyrite formation supports microbial growth

180 Culture J5 was transferred more than 20 times on medium containing FeS, H<sub>2</sub>S and CO<sub>2</sub> as  
181 sole substrates. This indicates a strict dependence on syntrophic pyrite formation as the only  
182 energy-yielding reaction observed. Within incubation periods of 83–248 days, cell densities  
183 increased by more than one order of magnitude, from  $2 \times 10^5$  cells mL<sup>-1</sup> to  $2\text{--}9 \times 10^6$  cells mL<sup>-1</sup>  
184 (Fig. S3). Cells were typically found to be attached to mineral surfaces (Fig. 4C); however,

## Microbial pyrite formation

185 there was no indication of cell encrustation (Fig. 4D). Assuming an average cell volume of  
186 about  $1 \mu\text{m}^3$  and a dry mass content of 33% (28), our measured cell densities correspond to a  
187 maximum of ca.  $3 \text{ mg dry cell mass L}^{-1}$ . If formation of ATP requires  $60\text{--}70 \text{ kJ mol}^{-1}$  (29) and if  
188 – under ideal growth conditions –  $10.5 \text{ g biomass (dry weight)}$  can be synthesized at the  
189 expense of  $1 \text{ mol ATP}$  (30), a complete conversion of  $5 \text{ mM FeS} + 5 \text{ mM H}_2\text{S}$  according to  
190 equ. 5 could yield  $4\text{--}5 \text{ mM ATP}$  or ca.  $50 \text{ mg dry cell mass L}^{-1}$ . Of course, the conditions of  
191 lithoautotrophic growth in our enrichment cultures are entirely different from those used in the  
192 growth experiment by Bauchop and Elsdén, with heterotrophic growth in an organically rich  
193 medium. Moreover, formation of pyrite from FeS is an extremely slow process catalyzed at or  
194 close to mineral surfaces with very slow substrate turnover, which implies that major amounts  
195 of metabolic energy have to be invested in cell maintenance without concomitant growth (31).  
196 Thus, it is not surprising that our cell yields are lower than estimated above. If every partial  
197 reaction in equ. 5 (5 in total;  $4 \times \text{FeS transformation}$ ,  $1 \times \text{CH}_4$  formation) uses about  $20 \text{ kJ}$  for  
198 synthesis of a minimum of  $1/3$  of an ATP equivalent (29), the total process could synthesize  
199  $5/3 \text{ mmol ATP equivalents per liter}$ . Considering that in culture J5 a maximum of 62.5% FeS  
200 conversion to  $\text{FeS}_2$  was observed (Table S2), the expected cell yield would – optimally – be  $12$   
201  $\text{mg cell dry matter L}^{-1}$ , which is close to the measured cell yield.

202 The community composition of culture J5 was analyzed by 16S rRNA gene clone libraries. All  
203 16S rRNA gene sequences derived from amplification with a universal archaeal primer set  
204 belonged to the same species-level operational taxonomic unit (OTU, 99% sequence identity)  
205 and showed 97.6% sequence identity to *Methanospirillum stamsii* (Fig. 4B), a  
206 hydrogenotrophic methanogen isolated from a low-temperature bioreactor (32).  
207 Methanogenesis in culture J5 is likely performed by this OTU. Using a universal bacterial

## Microbial pyrite formation

208 primer set, we detected five bacterial OTUs (Fig. 4A). The majority of clones (76%) belonged  
209 to OTU 3, which showed 99.9% sequence identity with *Desulfomicrobium baculatum*, a sulfate  
210 reducer within the class Deltaproteobacteria (33, 34). Further OTUs related to  
211 Deltaproteobacteria were OTU 2 (12% rel. abundance) and OTU1 (6% rel. abundance). OTU 2  
212 was closely related to *Desulfovibrio sulfodismutans* (97.9% sequence identity), which is  
213 capable of dismutating thiosulfate or sulfite (35), while OTU 1 was distantly related (96.2%  
214 sequence identity) to *Smithella propionica*, which is known to degrade propionate in syntrophy  
215 with methanogens (36). The remaining two bacterial OTUs were either distantly related (<91%  
216 sequence identity) to cultured members of the Firmicutes (OTU 4, 3% rel. abundance) or  
217 Actinobacteria (OTU 5, 3% rel. abundance). Interestingly, all OTUs belonging to the  
218 Deltaproteobacteria and Firmicutes fell into larger clusters that include cultured representatives  
219 with a sulfur-related energy metabolism. Therefore, it is tempting to speculate that enzymes  
220 operating in the respective sulfur transformation pathways might be involved in the microbial  
221 conversion of FeS to FeS<sub>2</sub>.

## 222 Conclusion

223 Pyrite is produced in massive quantities in today's sediments (2). However, its formation in  
224 nature is far from understood, especially because its nucleation is kinetically hindered (1). The  
225 presence of sulfide-producing microorganisms as passive pyrite nucleation sites indicated  
226 support for abiotic pyrite formation (13-15), but could not be reproduced in every bacterial  
227 model system (6). We show that pyrite formation can be mediated by microorganisms to  
228 overcome the kinetic hurdle of nucleation, but as an essential part of their energy metabolism  
229 and not just as a mere abiotic side reaction on their cell surface. This may help to explain the  
230 ambiguous results published so far on the role of microorganisms in this process. Since we

## Microbial pyrite formation

231 found only one archaeal species closely related to methanogens in our enrichments, it is likely  
232 that one or several of the bacterial partners actually catalyze FeS transformation to pyrite. An  
233 exciting question currently remaining is whether these bacteria utilize internally the H<sub>2</sub>S  
234 pathway (equ. 2) or a combination of sulfide oxidation to zero-valent sulfur coupled to the  
235 polysulfide pathway (equ. 1) to finally produce pyrite (Fig. S4).

236 Our results further showed that the reducing equivalents released from FeS transformation to  
237 pyrite can be transferred to methanogenesis. This opens an interesting perspective on the  
238 metabolic versatility sustaining the vast deep biosphere inhabiting the Earth's subsurface (37).  
239 While recalcitrant organic matter or H<sub>2</sub> released by radiolytic cleavage of water (38, 39) have  
240 been proposed to sustain the enigmatic life forms of the deep biosphere, there is also  
241 experimental evidence of a cryptic sulfur cycle within deep sediments that would include pyrite  
242 formation coupled to methanogenesis to be functional (17). Our results show that this missing  
243 link could indeed be mediated by microorganisms and supply energy to support microbial  
244 growth. Since the redox potential ( $E_h^{\circ}$ ) of the FeS/FeS<sub>2</sub> couple is -620 mV at circumneutral pH  
245 (40), it is well suited to provide reducing equivalents also for CO<sub>2</sub> fixation to acetate  
246 ( $E_h^{\circ} = -290$  mV) and more complex organic matter in the pyrite-forming microorganism.  
247 Wächtershäuser proposed in his "iron-sulfur world" theory that exactly this mechanism was the  
248 basis for an autocatalytic metabolism and the resulting evolution of life at hydrothermal vents  
249 on primordial Earth (e.g. 20, 41). Our enrichment cultures may serve as a model to understand  
250 the enzymatic background of this hypothesis.

## Microbial pyrite formation

### 251 Methods

#### 252 Cultivation

253 Enrichment cultures were initiated and maintained in carbonate-buffered, sulfide-reduced  
254 (1 mM) freshwater mineral medium (42) supplemented with selenite-tungstate solution (43), 7-  
255 vitamin solution (42), and trace element solution SL10 (44). The medium was prepared and  
256 stored under a N<sub>2</sub>/CO<sub>2</sub> atmosphere (80:20). The final pH was adjusted to 7.2 to 7.4. From a  
257 CO<sub>2</sub>-neutralized sulfide stock solution (45), 350 μmol H<sub>2</sub>S was added to 70 mL mineral  
258 medium in 180 mL serum bottles that were sealed with butyl rubber stoppers. Since 1 mM H<sub>2</sub>S  
259 was already present as reducing agent in the mineral medium, the final amount of H<sub>2</sub>S was  
260 420 μmol. FeS was prepared from anoxic solutions of 0.4 M FeCl<sub>2</sub> and 0.4 M Na<sub>2</sub>S. The  
261 resulting FeS precipitate was washed at least once and re-suspended in oxygen-free distilled  
262 water. For Mössbauer spectroscopy analysis, FeS was prepared from a FeCl<sub>2</sub> solution that  
263 contained 10% <sup>57</sup>FeCl<sub>2</sub> to enhance signal quality. 350 μmol FeS was added to 70 mL mineral  
264 medium. Enrichment cultures were incubated in the dark at 28°C if not indicated otherwise. For  
265 inhibition experiments, cultures were supplemented with either penicillin-G (1,000 U mL<sup>-1</sup>) or 2-  
266 bromoethanesulfonate (10 mM). Abiotic controls were run without inoculum.

#### 267 Monitoring of substrate turnover

268 For total dissolved sulfide measurements [ $\Sigma(\text{H}_2\text{S}_{\text{aq}}, \text{HS}^-, \text{S}^{2-})$ ], 100-μL samples were taken  
269 from liquid cultures without disturbing the precipitated iron sulfide minerals, and directly  
270 transferred to 100 μL of an anoxic 0.2 M NaOH solution. From the alkalinized sample, 10–  
271 20 μL were fixed in 100 μL of a 0.1 M zinc acetate solution, and sulfide was quantified by the  
272 methylene blue method (46). The corresponding amount of H<sub>2</sub>S in the headspace was  
273 calculated using Henry's law and a temperature-adjusted k-value of 0.093 (28°C, 47). CH<sub>4</sub> was

## Microbial pyrite formation

274 measured by gas chromatography with a flame ionization detector (SRI Instrument SGI 8610C)  
275 using a consecutive arrangement of a Porapak (80/100 mesh; 1 m × 2 mm) and a Hayesep-D  
276 packed column (80/100 mesh; 3 m × 2 mm). The injector and column temperatures were 60°C,  
277 and the detector temperature was 135°C. The carrier gas was N<sub>2</sub> at a flow rate of 3.2 ml min<sup>-1</sup>.  
278 Chromatograms were recorded with the PeakSimple v4.44 chromatography software.

279 Iron-sulfide minerals were analyzed by <sup>57</sup>Fe Mössbauer spectroscopy. Within an anoxic  
280 glovebox (100% N<sub>2</sub>), the enrichment culture was passed through a 0.44-μm filter and then  
281 sealed between two pieces of air-tight Kapton tape. Samples were transferred to a Mössbauer  
282 spectrometer (WissEl, Starnberg) within an airtight bottle filled with 100% N<sub>2</sub> that was only  
283 opened immediately prior to loading the samples inside the closed-cycle exchange gas  
284 cryostat (Janis cryogenics). Measurements were collected at a temperature of 5 K with a  
285 constant acceleration drive system (WissEL) in transmission mode with a <sup>57</sup>Co/Rh source and  
286 calibrated against a 7 μm thick α-<sup>57</sup>Fe foil measured at room temperature. All spectra were  
287 analyzed using Recoil (University of Ottawa) by applying the Voight Based Fitting (VBF)  
288 routine (48). The half width at half maximum (HWHM) was fixed to a value of 0.138 mm s<sup>-1</sup> for  
289 all samples.

290 X-ray diffraction (XRD) patterns were recorded with the D8 Discover system (Bruker) with IμS  
291 radiation source (2 mm in diameter), and a Lynxexe XE detector. Samples were dried for 2 h  
292 under a continuous stream of 100% N<sub>2</sub> and measured within 48 h under air as described  
293 previously (49). Measurements were done using CuKα rays in angles ranging from 10–70° 2θ  
294 in 0.02° steps with 2,880 sec measuring time and a total measuring time of 12 h and 47 min.  
295 The resulting spectra were compared with spectra provided in the international crystal structure

## Microbial pyrite formation

296 database (ICSD), FIZ Karlsruhe (version 2016/2) using the software DIFFRAC.EVA (version  
297 4.1.1, Bruker).

### 298 [Scanning electron microscopy coupled to energy dispersive x-ray spectroscopy \(SEM-EDX\)](#)

299 For SEM-EDX analysis, 1 mL of culture was centrifuged at 4,500  $\times g$  for 10 min. 200  $\mu\text{L}$  of the  
300 resulting pellet was transferred on gelatin-coated glass slides. Samples were fixed in 1 mL  
301 2.5% glutaraldehyde in 0.1 M HEPES-buffer containing 0.01 M KCl (HEPES-KCl) and in 2%  
302  $\text{OsO}_4$  in HEPES-KCl for 60 min each. Fixed samples were dehydrated in a graded ethanol  
303 series (30%, 50%, 70%, 80%, 90%, 96% and absolute ethanol) for 30 min each. Thereafter,  
304 samples were critical-point dried under  $\text{CO}_2$  in a Bal-Tec CPD030 (Balzers). Sputter coating of  
305 6 nm platinum was done in a Quorum Q150R ES sputter coater (Quorum Technologies) and  
306 micrographs were taken with a FESEM Auriga 40 (Zeiss). EDX mappings and point  
307 measurements were taken at a working distance of 5 mm with an Oxford X-Max detector  
308 (Oxford Instruments) and at 10 kV and 15 kV, respectively. Point measurements were  
309 normalized to 10,000 counts within a  $\text{K}\alpha$  energy of 6.3–6.5 keV. Sample preparation for cell  
310 counts by fluorescent microscopy is described in detail in the Supporting Information.

### 311 [Phylogenetic analysis](#)

312 Total genomic DNA was extracted from 50 mL of a 4.5-months old culture using a phenol-  
313 based beat-beating protocol modified after Loy, Beisker and Meier (50). Subsequent  
314 amplification of bacterial or archaeal 16S rRNA genes was done using standard PCR protocols  
315 based on universal primers. Details are given in the Supporting Information. 16S rRNA gene  
316 clone libraries were constructed using the TOPO® TA Cloning® Kit (ThermoFisher Scientific).  
317 Bacterial or archaeal 16S rRNA gene fragments were aligned by use of the SINA webaligner  
318 (51) to the non-redundant 16S rRNA gene database v.123.1 available on the SILVA online

## Microbial pyrite formation

319 platform (52, [www.arb-silva.de](http://www.arb-silva.de)) and imported into ARB for initial phylogenetic analysis (53).  
320 OTU clustering was performed in mothur v.1.22.2 (54) using the furthest neighbor approach  
321 and a 99%-identity cutoff to delineate OTUs at the approximate species level (55). For  
322 phylogenetic inference of 16S rRNA gene fragments representing individual OTUs, Maximum  
323 Likelihood (ML) trees were calculated using RAxML v8.2.9 (56) as implemented on the  
324 CIPRES webserver (57, [www.phylo.org](http://www.phylo.org)). Using a 50% conservation filter of nucleic acid  
325 positions within the domain Bacteria, a RAxML tree was inferred from 1,102 unambiguously  
326 aligned nucleic acid positions for bacterial 16S rRNA genes. The reconstruction of the archaeal  
327 tree followed the same outline but using 752 unambiguously aligned nucleic acid positions and  
328 no conservation filter because of the close relatedness of all included sequences. Calculations  
329 were based on the GTRGAMMA distribution model of substitution rate heterogeneity. MRE-  
330 based bootstrap analysis stopped after 204 and 102 replicates for the bacterial and archaeal  
331 16S rRNA gene tree, respectively. Sequences are available from NCBI GenBank under  
332 accession numbers MH665848–MH665880 and MH665881–MH665889 for Bacteria and  
333 Archaea, respectively.

## 334 Acknowledgements

335 This study was financed by the Konstanz Research School Chemical Biology (KoRs-CB). We  
336 are grateful to Waltraud Dilling for maintaining initial pyrite-forming enrichments and to Ben  
337 Griffin for his initial work on the latter. We further thank Michael Laumann for his engagement  
338 with SEM-EDX, Stephan Siroky and the Particle Analysis Center for the XRD analysis, as well  
339 as the Bioimaging Center (University of Konstanz).



## Microbial pyrite formation

### 340 Figures

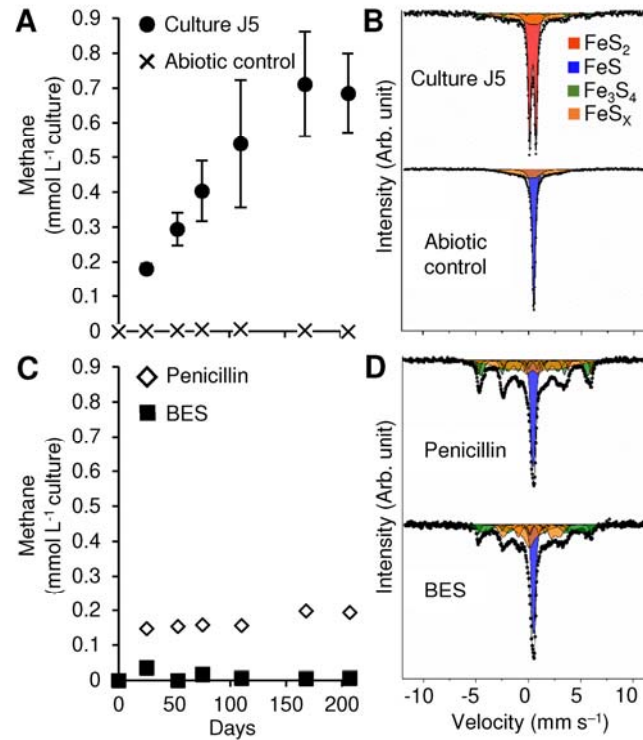

341

342 Figure 1. Time-resolved CH<sub>4</sub> formation in comparison to iron-sulfur mineral composition after  
343 nearly seven months of incubation (207 days) in culture J5 as compared to abiotic controls and  
344 incubations of culture J5 with penicillin-G (1,000 U ml<sup>-1</sup>) or 2-bromoethanesulfonate (BES,  
345 10 mM). (A) and (C) show the mean ± one standard deviation of CH<sub>4</sub> measurements of three  
346 independent incubations. Standard deviations are often smaller than the actual symbol size.  
347 (B) and (D) show Mössbauer spectra corresponding to the last time point in the presented time  
348 series with FeS<sub>2</sub> in red, FeS in blue, Fe<sub>3</sub>S<sub>4</sub> in green, and intermediate FeS<sub>x</sub> phases in orange.

### Microbial pyrite formation

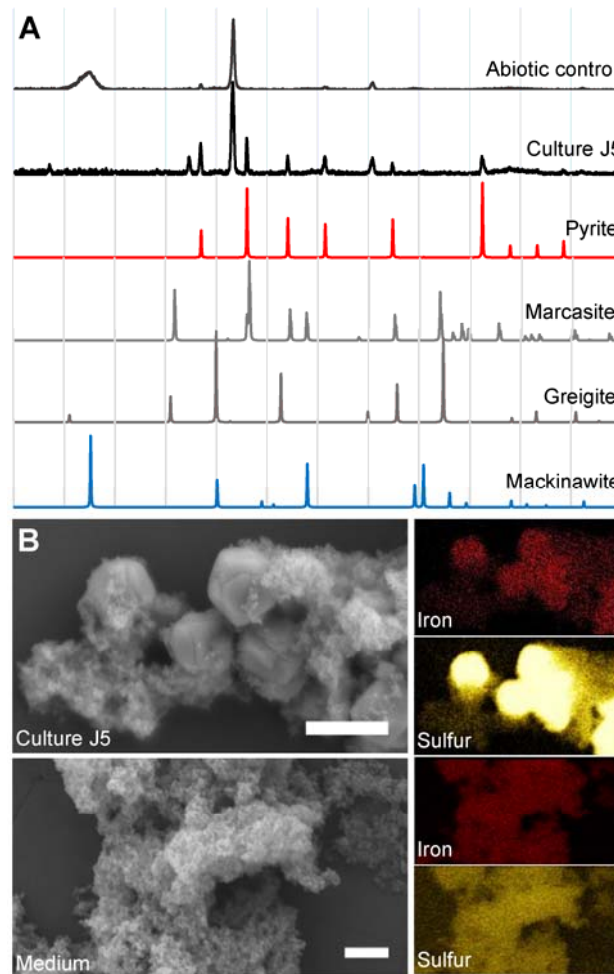

349

350 Figure 2. (A) Representative X-ray diffractograms of mineral precipitates formed in culture J5  
351 and an abiotic control setup after 9 months of incubation (281 days). Diffraction data of the two  
352 FeS<sub>2</sub> dimorphs pyrite and marcasite as well as of Fe<sub>3</sub>S<sub>4</sub> (greigite) and FeS (mackinawite) are  
353 given as reference. (B) Scanning electron microscopy images of a nearly 7-months old (211  
354 days) culture J5 in comparison to freshly prepared medium without inoculum. The scale bar  
355 represents 2 μm. Images to the right show the corresponding results from energy dispersive X-  
356 ray spectroscopy (EDX). Besides atoms from medium salts, iron and sulfur were the only  
357 elements discovered in the mineral phases.

### Microbial pyrite formation

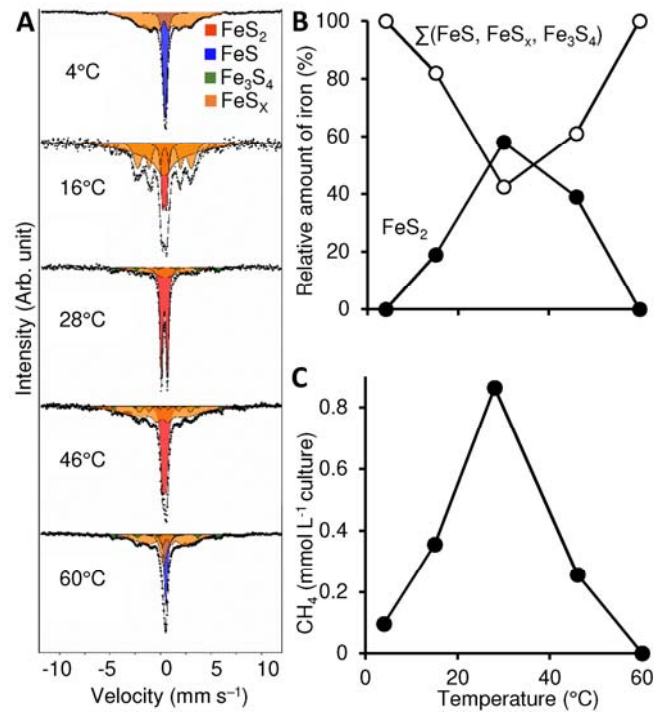

358

359 Figure 3. Temperature-dependent pyrite and methane formation in culture J5 after nearly 7  
360 months of incubation (207 days). A) Mössbauer spectra showing the temperature-dependent  
361 iron-sulfur mineral composition (FeS<sub>2</sub> in red, FeS in blue, Fe<sub>3</sub>S<sub>4</sub> in green, and intermediate  
362 FeS<sub>x</sub> phases in orange). B) Relative abundance of pyrite (FeS<sub>2</sub>) in comparison to all other  
363 measured iron-sulfur minerals plotted against temperature as the explanatory variable. Details  
364 are provided in Table S2. C) Average amount of methane (n=2) plotted against temperature as  
365 the explanatory variable.

Microbial pyrite formation

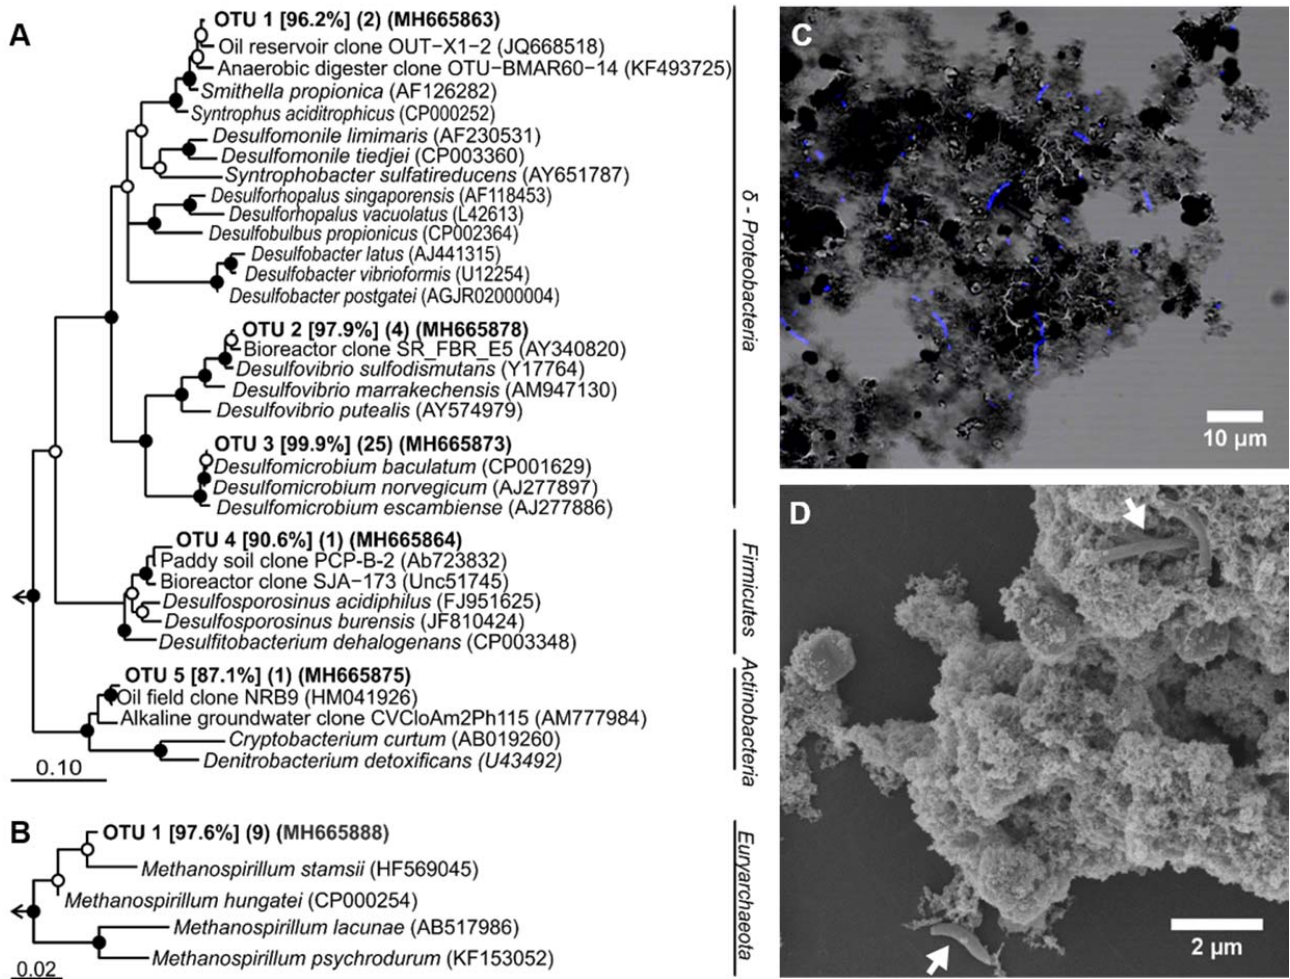

366

367 Figure 4. Bacterial and archaeal community composition of enrichment culture J5. RAxML  
 368 trees based on bacterial (A) and archaeal (B) 16S rRNA gene sequences obtained from culture  
 369 J5. Representative sequences of OTUs at the approximate species level (99% sequence  
 370 identity) are shown. Sequence identity to the next cultured relative is given in percent in square  
 371 brackets. Numbers of clones from the same OTU are presented in parenthesis followed by the  
 372 GenBank accession number of a representative sequence. Bootstrap support is indicated by  
 373 closed ( $\geq 90\%$ ) and open ( $\geq 70\%$ ) circles at the respective branching points. The scale bar  
 374 represents 10% (Bacteria) and 2% (Archaea) estimated sequence divergence. (C) Combined  
 375 phase contrast image and fluorescent image of DAPI-stained cells and (D) scanning electron

## Microbial pyrite formation

376 microscopy image with cells indicated by white arrows of culture J5 after 7.4 and 10 months of  
377 incubation, respectively.

378

## Microbial pyrite formation

### 379 References

- 380 1. Rickard D, Luther GW (2007) Chemistry of iron sulfides. *Chem Rev* 107(2):514-562.
- 381 2. Canfield DE, Farquhar J (2012) The global sulfur cycle. *Fundamentals of Geobiology*, eds Knoll H, Canfield  
382 DE, & Konhauser KO (John Wiley & Sons, Oxford), pp 49-64.
- 383 3. Rickard D, Luther GW (1997) Kinetics of pyrite formation by the H<sub>2</sub>S oxidation of iron(II) monosulfide in  
384 aqueous solutions between 25 and 125°C: The mechanism. *Geochim Cosmochim Acta* 61(1):135-147.
- 385 4. Rickard D, Butler IB, Oldroyd A (2001) A novel iron sulphide mineral switch and its implications for Earth  
386 and planetary science. *Earth Planet Sc Lett* 189(1-2):85-91.
- 387 5. Berner RA (1970) Sedimentary pyrite formation. *Am J Sci* 268(1):1-23.
- 388 6. Picard A, Gartman A, Clarke DR, Girguis PR (2018) Sulfate-reducing bacteria influence the nucleation and  
389 growth of mackinawite and greigite. *Geochim Cosmochim Acta* 220:367-384.
- 390 7. Wilkin RT, Barnes HL (1996) Pyrite formation by reactions of iron monosulfides with dissolved inorganic  
391 and organic sulfur species. *Geochim Cosmochim Acta* 60(21):4167-4179.
- 392 8. Schoonen MAA, Barnes HL (1991) Reactions forming pyrite and marcasite from solution .1. Nucleation of  
393 FeS<sub>2</sub> below 100°C. *Geochim Cosmochim Acta* 55(6):1495-1504.
- 394 9. Rickard D (1969) The microbiological formation of iron sulphides. *Stockholm Contributions to Geology*  
395 20:49-66.
- 396 10. Benning LG, Wilkin RT, Barnes HL (2000) Reaction pathways in the Fe-S system below 100°C. *Chem Geol*  
397 167(1-2):25-51.
- 398 11. Benning L, Barnes H (1998) In situ determination of the stability of iron monosulphides and kinetics of  
399 pyrite formation. *Mineral Mag A* 62:151-152.
- 400 12. Berner RA (1984) Sedimentary pyrite formation - an update. *Geochim Cosmochim Acta* 48(4):605-615.
- 401 13. Finster K, Liesack W, Thamdrup B (1998) Elemental sulfur and thiosulfate disproportionation by  
402 *Desulfocapsa sulfoexigens* sp. nov., a new anaerobic bacterium isolated from marine surface sediment.  
403 *Appl Environ Microbiol* 64(1):119-125.
- 404 14. Canfield DE, Thamdrup B, Fleischer S (1998) Isotope fractionation and sulfur metabolism by pure and  
405 enrichment cultures of elemental sulfur-disproportionating Bacteria. *Limnol Oceanogr* 43(2):253-264.
- 406 15. Thamdrup B, Finster K, Hansen JW, Bak F (1993) Bacterial disproportionation of elemental sulfur coupled  
407 to chemical-reduction of iron or manganese. *Appl Environ Microbiol* 59(1):101-108.
- 408 16. Donald R, Southam G (1999) Low temperature anaerobic bacterial diagenesis of ferrous monosulfide to  
409 pyrite. *Geochim Cosmochim Acta* 63(13-14):2019-2023.



## Microbial pyrite formation

- 410 17. Holmkvist L, Ferdelman TG, Jørgensen BB (2011) A cryptic sulfur cycle driven by iron in the methane  
411 zone of marine sediment (Aarhus Bay, Denmark). *Geochim Cosmochim Acta* 75(12):3581-3599.
- 412 18. Wächtershäuser G (1988) Before enzymes and templates: theory of surface metabolism. *Microbiol Rev*  
413 52(4):452-484.
- 414 19. Wächtershäuser G (2007) On the chemistry and evolution of the pioneer organism. *Chem Biodivers*  
415 4(4):584-602.
- 416 20. Martin W, Russell MJ (2003) On the origins of cells: a hypothesis for the evolutionary transitions from  
417 abiotic geochemistry to chemoautotrophic prokaryotes, and from prokaryotes to nucleated cells. *Philos*  
418 *Trans R Soc Lond B Biol Sci* 358(1429):59-83.
- 419 21. Wan M, Schroder C, Peiffer S (2017) Fe(III): S(-II) concentration ratio controls the pathway and the  
420 kinetics of pyrite formation during sulfidation of ferric hydroxides. *Geochim Cosmochim Acta* 217:334-  
421 348.
- 422 22. Vandenberghe RE, de Grave E, de Bakker PMA, Krs M, Hus JJ (1992) Mössbauer effect study of natural  
423 greigite. *Hyperfine Interact* 68(1):319-322.
- 424 23. Hunger S, Benning LG (2007) Greigite: a true intermediate on the polysulfide pathway to pyrite.  
425 *Geochem T* 8:1. <https://doi.org/10.1186/1467-4866-1188-1181>.
- 426 24. Bourdoiseau JA, Jeannin M, Remazeilles C, Sabota R, Refait P (2011) The transformation of mackinawite  
427 into greigite studied by Raman spectroscopy. *J Raman Spectrosc* 42(3):496-504.
- 428 25. Oremland RS, Capone DG (1988) Use of specific inhibitors in biogeochemistry and microbial ecology. *Adv*  
429 *Microb Ecol* 10:285-383.
- 430 26. Schink B, Stams AJM (2006) Syntrophism among prokaryotes. *The Prokaryotes*, ed Dworkin M, Falkow,  
431 S., Rosenberg, E., Schleifer, K.-H., Stackebrandt, E. (Springer, Singapore), Third Ed Vol 2, pp 309-335.
- 432 27. Drobner E, Huber H, Wächtershäuser G, Rose D, Stetter KO (1990) Pyrite formation linked with hydrogen  
433 evolution under anaerobic conditions. *Nature* 346(6286):742-744.
- 434 28. Bratbak G, Dundas I (1984) Bacterial dry-matter content and biomass estimations. *Appl Environ*  
435 *Microbiol* 48(4):755-757.
- 436 29. Schink B (1997) Energetics of syntrophic cooperation in methanogenic degradation. *Microbiol Mol Biol*  
437 *Rev* 61(2):262-280.
- 438 30. Bauchop T, Elsdon SR (1960) The growth of micro-organisms in relation to their energy supply. *J Gen*  
439 *Microbiol* 23(3):457-469.
- 440 31. Pirt SJ (1982) Maintenance energy - a general-model for energy-limited and energy-sufficient growth.  
441 *Arch Microbiol* 133(4):300-302.

## Microbial pyrite formation

- 442 32. Parshina SN, Ermakova AV, Bomberg M, Detkova EN (2014) *Methanospirillum stamsii* sp. nov., a  
443 psychrotolerant, hydrogenotrophic, methanogenic archaeon isolated from an anaerobic expanded  
444 granular sludge bed bioreactor operated at low temperature. *Int J Syst Evol Microbiol* 64(1):180-186.
- 445 33. Rozanova EP, Nazina TN (1976) A mesophilic, sulfate-reducing, rod-shaped, non-spore-forming  
446 bacterium. *Microbiologiya (USSR)* 45(5):825-830.
- 447 34. Rozanova EP, Nazina TN, Galushko AS (1988) Isolation of a new genus of sulfate-reducing bacteria and  
448 description of a new species of this genus, *Desulfomicrobium apsheronum* gen. nov., sp. nov.  
449 *Microbiologiya (USSR)* 57(4):634-641.
- 450 35. Bak F, Pfennig N (1987) Chemolithotrophic growth of *Desulfovibrio sulfodismutans* sp. nov. by  
451 disproportionation of inorganic sulfur-compounds. *Arch Microbiol* 147(2):184-189.
- 452 36. Liu YT, Balkwill DL, Aldrich HC, Drake GR, Boone DR (1999) Characterization of the anaerobic propionate-  
453 degrading syntrophs *Smithella propionica* gen. nov., sp. nov. and *Syntrophobacter wolinii*. *Int J Syst*  
454 *Bacteriol* 49:545-556.
- 455 37. Jørgensen BB, Marshall IPG (2016) Slow microbial life in the seabed. *Annu Rev Mar Sci* 8:311-332.
- 456 38. Jørgensen BB, D'Hondt S (2006) A starving majority deep beneath the seafloor. *Science* 314(5801):932-  
457 934.
- 458 39. Lin L-H, Slater G, Lollar B, Lacrampe-Couloume G, Onstott TC (2005) The yield and isotopic composition  
459 of radiolytic H<sub>2</sub>, a potential energy source for the deep subsurface biosphere. *Geochim Cosmochim Acta*  
460 69(4):893-903.
- 461 40. Kaschke M, Russell MJ, Cole WJ (1994) [Fes/Fes(2)] - a redox system for the origin of life. *Origins Life Evol*  
462 *B* 24(1):43-56.
- 463 41. Wächtershäuser G (2006) From volcanic origins of chemoautotrophic life to Bacteria, Archaea and  
464 Eukarya. *Philos Trans R Soc Lond B Biol Sci* 361(1474):1787-1806.
- 465 42. Widdel F, Pfennig N (1981) Studies on dissimilatory sulfate-reducing bacteria that decompose fatty  
466 acids. I. Isolation of new sulfate-reducing bacteria enriched with acetate from saline environments.  
467 Description of *Desulfobacter postgatei* gen. nov., sp. nov. *Arch Microbiol* 129(5):395-400.
- 468 43. Tschech A, Pfennig N (1984) Growth-yield increase linked to caffeate reduction in *Acetobacterium*  
469 *woodii*. *Arch Microbiol* 137(2):163-167.
- 470 44. Widdel F, Kohring GW, Mayer F (1983) Studies on dissimilatory sulfate-reducing bacteria that  
471 decompose fatty-acids .3. Characterization of the filamentous gliding *Desulfonema limicola* gen. nov sp.  
472 nov, and *Desulfonema magnum* sp. nov. *Arch Microbiol* 134(4):286-294.
- 473 45. Siefert E, Pfennig N (1984) Convenient method to prepare neutral sulfide solution for cultivation of  
474 phototrophic sulfur bacteria. *Arch Microbiol* 139(1):100-101.
- 475 46. Cline JD (1969) Spectrophotometric determination of hydrogen sulfide in natural waters. *Limnol*  
476 *Oceanogr* 14(3):454-458.



## Microbial pyrite formation

- 477 47. Carroll JJ, Mather AE (1989) The solubility of hydrogen-sulfide in water from 0°C to 90°C and pressures  
478 to 1 MPa. *Geochim Cosmochim Acta* 53(6):1163-1170.
- 479 48. Rancourt DG, Ping JY (1991) Voigt-based methods for arbitrary-shape static hyperfine parameter  
480 distributions in mössbauer spectroscopy. *Nucl Instrum Meth B* 58(1):85-97.
- 481 49. Taylor P, Rummery TE, Owen DG (1979) Reactions of iron monosulfide solids with aqueous hydrogen-  
482 sulfide up to 160°C. *J Inorg Nucl Chem* 41(12):1683-1687.
- 483 50. Loy A, Beisker W, Meier H (2005) Diversity of bacteria growing in natural mineral water after bottling.  
484 *Appl Environ Microbiol* 71(7):3624-3632.
- 485 51. Pruesse E, *et al.* (2007) SILVA: a comprehensive online resource for quality checked and aligned  
486 ribosomal RNA sequence data compatible with ARB. *Nucleic Acids Res* 35(21):7188-7196.
- 487 52. Quast C, *et al.* (2013) The SILVA ribosomal RNA gene database project: improved data processing and  
488 web-based tools. *Nucleic Acids Res* 41(D1):D590-D596.
- 489 53. Ludwig W, *et al.* (2004) ARB: a software environment for sequence data. *Nucleic Acids Res* 32(4):1363-  
490 1371.
- 491 54. Schloss PD, *et al.* (2009) Introducing mothur: open-source, platform-independent, community-  
492 supported software for describing and comparing microbial communities. *Appl Environ Microbiol*  
493 75(23):7537-7541.
- 494 55. Stackebrandt E, Ebers J (2006) Taxonomic parameters revisited: tarnished gold standards. *Microbiology*  
495 *Today* 33(4):152–154.
- 496 56. Stamatakis A (2014) RAxML version 8: a tool for phylogenetic analysis and post-analysis of large  
497 phylogenies. *Bioinformatics* 30(9):1312-1313.
- 498 57. Miller MA, Pfeiffer W, Schwartz T (2010) Creating the CIPRES Science Gateway for inference of large  
499 phylogenetic trees. *2010 Gateway Computing Environments Workshop (GCE)*, pp 1-8.
- 500 58. Berthold MR, *et al.* (2008) KNIME: The Konstanz Information Miner. (Springer), pp 319-326.
- 501 59. Loy A, *et al.* (2002) Oligonucleotide microarray for 16S rRNA gene-based detection of all recognized  
502 lineages of sulfate-reducing prokaryotes in the environment. *Appl Environ Microbiol* 68(10):5064-5081.
- 503 60. Berry D, Ben Mahfoudh K, Wagner M, Loy A (2011) Barcoded primers used in multiplex amplicon  
504 pyrosequencing bias amplification. *Appl Environ Microbiol* 77(21):7846-7849.
- 505 61. Lueders T, Friedrich MW (2002) Effects of amendment with ferrihydrite and gypsum on the structure  
506 and activity of methanogenic populations in rice field soil. *Appl Environ Microbiol* 68(5):2484-2494.
- 507 62. Casamayor EO, *et al.* (2002) Changes in archaeal, bacterial and eukaryal assemblages along a salinity  
508 gradient by comparison of genetic fingerprinting methods in a multipond solar saltern. *Environ Microbiol*  
509 4(6):338-348.

## Microbial pyrite formation

### 510 [Supporting Information](#)

### 511 [Supporting Materials and Methods](#)

512 **Cell counts by fluorescence microscopy.** For cell counts, 0.5 mL culture was fixed overnight  
513 in 9.5 mL freshly prepared paraformaldehyde solution (4%), subsequently centrifuged at  
514 10,000 ×g for 10 min at 4°C and re-suspended in 1 mL PBS [130 mM NaCl, 5% (v/v)  
515 phosphate buffer (40 mM NaH<sub>2</sub>PO<sub>4</sub>, 160 mM Na<sub>2</sub>HPO<sub>4</sub>), pH 7.2] and 9 mL ammonium oxalate  
516 solution (5.6 g ammonium-oxalate and 4.2 g oxalic acid dihydrate in 200 mL distilled water).  
517 Samples were vortexed for 10 min to dissolve most of the iron sulfide minerals so that cells  
518 could be collected on a 0.2 µm pore size filter (GTTP-white, Millipore). Filters were air-dried  
519 and stored at –20°C. Filter sections were stained with a 1 µg mL<sup>-1</sup> 4',6-diamidino-2-  
520 phenylindole (DAPI) solution and incubated for 10 min in the dark. Thereafter, filters were  
521 washed for 5 min in distilled water, followed by two 1-min washing steps in 80% ethanol. Dry  
522 DAPI-stained filters were mounted on microscope slides using CitiFluor™ AF1. For  
523 fluorescence microscopy, an inverted microscope (AxioObserver, Zeiss) with a 40x/0.60 LD-  
524 PlanNeofluar objective was used. Z-stacks were acquired with a distance of 0.28 µm. Image  
525 processing involved 3-dimensional deconvolution of each stack using a theoretical PSF with  
526 ZEN Black (Zeiss AG). Cells were counted using an image processing workflow set up in  
527 KNIME 3.4.0 (58) using orthogonal projections of the de-convoluted input stacks. The workflow  
528 is available at <https://github.com/bic-kn/cell-counting-workflow>.

529 **DNA extraction.** The DNA extraction protocol was adopted from (50). A 4.5-month old 50-mL  
530 culture was harvested after CH<sub>4</sub> concentrations reached a plateau of 2.1% in the headspace  
531 (corresponding to 55 µmol produced CH<sub>4</sub>). Harvesting was done by 10 min of centrifugation at  
532 6,000 ×g. The pellet was re-suspended in 400 µL autoclaved TE-Buffer (10 mM Tris & 1 mM

## Microbial pyrite formation

533 EDTA in MQ water, pH 8) and stored for three hours at  $-20^{\circ}\text{C}$ . Cells were thawed on ice,  
534 mixed with heat-sterilized zirconium beads (0.1 mm), 600  $\mu\text{L}$  phenol/chloroform/isoamylalcohol  
535 (25:24:1, Carl Roth), and 150  $\mu\text{L}$  of a 10% sterile-filtered SDS-solution in a screw-cap tube,  
536 and vigorously shaken for 20 min using a vortexer. After centrifugation for 20 min at  $20,817 \times g$   
537 and  $4^{\circ}\text{C}$ , the aqueous supernatant was transferred to a new reaction tube. Because the  
538 aqueous phase was hardly visible due to remaining iron sulfide minerals, another 10-minute  
539 centrifugation step was used to remove residual phenol from the extract. DNA was precipitated  
540 by incubation at  $-20^{\circ}\text{C}$  overnight in 0.1 volume of 3 M Na-acetate (in MQ-water, autoclaved)  
541 and 2.5 volumes absolute ethanol. Afterwards, the pellet was washed twice with 70% ethanol,  
542 dried for 5 min, and re-suspended in 50  $\mu\text{L}$  DNase- and RNase- free  $\text{H}_2\text{O}$ . DNA concentrations  
543 were quantified fluorimetrically using Quant-iT PicoGreen (Invitrogen).

544 **16S rRNA gene clone library.** Amplification of bacterial 16S rRNA genes was performed with  
545 Bact8f (5'-AGA GTT TGA TYM TGG CTC-3') as forward primer (59) and 1492r (5'-N TAC  
546 CTT GTT ACG ACT-3') as reverse primer (60). Archaeal species were targeted by AR109F  
547 (5'-ACK GCT CAG TAA CAC GT-3') as forward (61) and AR915 (3'-GTG CTC CCC CGC CAA  
548 TTC CT-3') as reverse primer (62). The PCR mixture contained 0.2 mM of each dNTP, 2 mM  
549  $\text{MgCl}_2$ , 20  $\mu\text{g}$  BSA, 1 U of *Taq* DNA polymerase, and a *Taq* polymerase buffer with KCl  
550 (ThermoFisher Scientific). The PCR was performed using an initial denaturation at  $95^{\circ}\text{C}$  for  
551 5 min; 30 cycles of  $95^{\circ}\text{C}$  for 30 s,  $50^{\circ}\text{C}$  for 30 s,  $72^{\circ}\text{C}$  for 1.5 min; and a final elongation at  
552  $72^{\circ}\text{C}$  for 7 min. For PCRs with archaeal primers, the annealing temperature was set to  $55^{\circ}\text{C}$ .  
553 Amplification products were purified by use of the Zymo Research DNA Clean & Concentrator  
554 Kit (Zymo Research). 16S rRNA clone libraries were obtained with the TOPO® TA Cloning®  
555 Kit (ThermoFisher Scientific). Clones were screened by M13-PCR for inserts of the correct size

### Microbial pyrite formation

556 according to the manufacturer's instructions. Resulting PCR products of expected length were  
557 purified by use of the Zymo Research DNA Clean & Concentrator Kit and sent for sequencing.

## Microbial pyrite formation

### 558 Supporting Tables

### 559 Table S1. Overview of inocula used to establish initial pyrite-forming enrichment cultures.

| Enrichment | Date       | Sampling area                                       | Material               | Medium†    | Temp. (°C) | pH  |
|------------|------------|-----------------------------------------------------|------------------------|------------|------------|-----|
| J5*        | Sept. 1995 | Sewage treatment plant<br>Konstanz, Germany         | digested sewage sludge | freshwater | 28         | 7.2 |
| J2*        | Sept. 1995 | Sewage treatment plant<br>Konstanz, Germany         | digested sewage sludge | freshwater | 16         | 7.2 |
| J7         | Apr. 1993  | Rio Tentor (Venice, Italy)                          | brackish sediment      | marine     | 16         | 7.2 |
| J8*        | Mar. 1991  | Wadden sea sediment,<br>Groningen, The Netherlands  | marine sediment        | marine     | 16         | 7.2 |
| J9*        | Apr. 1993  | Fish market channel<br>(Venice, Italy)              | brackish sediment      | marine     | 16         | 7.2 |
| X1         | Sept. 1995 | Sewage treatment plant<br>Tübingen-Lustnau, Germany | digested sewage sludge | freshwater | 28         | 7.2 |
| X2         | Sept. 1995 | Lake Constance, Güll                                | freshwater sediment    | freshwater | 28         | 7.2 |

† after Widdel and Pfennig (42)

\* CH<sub>4</sub> formation observed

560  
561  
562  
563

Microbial pyrite formation

564 Table S2. Iron mineral analysis by Mössbauer spectroscopy at a temperature of 5 K in nearly  
 565 7-month-old (207 days) culture J5 incubated at various temperatures and in the presence of  
 566 various inhibitors. Mössbauer parameters were obtained through Voigt based fitting (VBF).  $\delta$  –  
 567 isomer shift,  $\Delta E_Q$  – quadrupole splitting,  $\epsilon$  – quadrupole shift,  $B_{hf}$  – internal magnetic field, R.A.  
 568 – relative area,  $X^2$  – goodness of fit parameter. The absolute amount of formed  $FeS_2$  was  
 569 inferred from the relative area of the  $FeS_2$  signal and the maximum amount of 350  $\mu mol$  that  
 570 could be produced if all FeS would have been converted to  $FeS_2$ .

| Sample                                 | Phase     | $\delta$<br>(mm/s) | $\Delta E_Q$<br>(mm/s) | $\epsilon$<br>(mm/s) | $B_{hf}$<br>(T) | R. A.<br>% | $X^2$ | $FeS_2$<br>( $\mu mol$ ) |
|----------------------------------------|-----------|--------------------|------------------------|----------------------|-----------------|------------|-------|--------------------------|
| Abiotic control                        | FeS       | 0.43               |                        | 0.15                 | 13.1            | 64.3       | 1.67  |                          |
|                                        | $FeS_x$   | 0.50               | 0.13                   |                      |                 | 35.7       |       |                          |
| 4 °C                                   | FeS       | 0.47               | 0.27                   |                      |                 | 37.8       | 6.01  |                          |
|                                        | $FeS_x$   | 0.43               |                        | 0.07                 | 17.2            | 62.2       |       |                          |
| 16 °C                                  | $FeS_2$   | 0.41               | 0.38                   |                      |                 | 18.5       | 0.78  | 64.8                     |
|                                        | $FeS_x$   | 0.39               |                        | 0.02                 | 19.2            | 48.8       |       |                          |
|                                        | $FeS_x$   | 0.42               |                        | -0.02                | 16.5            | 32.7       |       |                          |
| 28 °C<br>Replicate I                   | $FeS_2$   | 0.41               | 0.50                   |                      |                 | 52.8       | 0.88  | 184.8†                   |
|                                        | $FeS_x$   | 0.32               |                        | 0.07                 | 15.7            | 38.9       |       |                          |
|                                        | $Fe_3S_4$ | 0.46               |                        | 0.05                 | 32.0            | 8.3        |       |                          |
| 28 °C<br>Replicate II                  | $FeS_2$   | 0.40               | 0.58                   |                      |                 | 62.5       | 0.78  | 218.8§                   |
|                                        | $FeS_x$   | 0.29               |                        | -0.2                 | 16.4            | 31.0       |       |                          |
|                                        | $Fe_3S_4$ | 0.60               |                        | -0.05                | 32.0            | 6.5        |       |                          |
| 46 °C                                  | $FeS_2$   | 0.42               | 0.41                   |                      |                 | 39.4       | 1.67  | 137.9                    |
|                                        | $FeS_x$   | 0.10               |                        | -0.09                | 21.1            | 50.5       |       |                          |
|                                        | $FeS_x$   | 0.40               |                        | 0.05                 | 15.7            | 7.8        |       |                          |
|                                        | $Fe_3S_4$ | 0.64               |                        | 0.03                 | 33.2            | 2.3        |       |                          |
| 60 °C                                  | FeS       | 0.54               | 0.16                   |                      |                 | 27.1       | 1.74  |                          |
|                                        | $FeS_x$   | 0.34               |                        | 0.05                 | 2.4             | 21.6       |       |                          |
|                                        | $FeS_x$   | 0.55               |                        | -0.08                | 16.6            | 43.9       |       |                          |
|                                        | $Fe_3S_4$ | 0.63               |                        | -0.08                | 31.9            | 7.3        |       |                          |
| Penicillin + 79% $H_2$<br>( headspace) | FeS       | 0.51               | 0.16                   |                      |                 | 31.6       | 1.12  |                          |
|                                        | $FeS_x$   | 0.38               |                        | 0.15                 | 5.3             | 17.4       |       |                          |
|                                        | $FeS_x$   | 0.85               |                        | 0.01                 | 23.0            | 37.5       |       |                          |
|                                        | $FeS_x$   | 0.46               |                        | -0.07                | 15.5            | 13.4       |       |                          |
| Penicillin                             | FeS       | 0.46               | 0.27                   |                      |                 | 26.4       | 1.15  |                          |
|                                        | $Fe_3S_4$ | 0.68               |                        | -0.04                | 33.1            | 8.8        |       |                          |
|                                        | $Fe_3S_4$ | 0.52               |                        | 0.05                 | 31.7            | 18.8       |       |                          |
|                                        | $FeS_x$   | 0.44               |                        | 0.00                 | 14.9            | 15.0       |       |                          |
|                                        | $FeS_x$   | 0.43               |                        | 0.02                 | 20.2            | 31.1       |       |                          |
| BES                                    | FeS       | 0.50               | 0.22                   |                      |                 | 28.1       | 0.76  |                          |
|                                        | $Fe_3S_4$ | 0.69               |                        | -0.15                | 29.6            | 23.4       |       |                          |
|                                        | $Fe_3S_4$ | 0.62               |                        | 0.02                 | 33.1            | 7.1        |       |                          |
|                                        | $FeS_x$   | 0.25               |                        | 0.15                 | 7.4             | 20.2       |       |                          |
|                                        | $FeS_x$   | 0.44               |                        | -0.16                | 16.6            | 21.2       |       |                          |

† corresponding amount of formed  $CH_4$ : 44.9  $\mu mol$

§ corresponding amount of formed  $CH_4$ : 67.6  $\mu mol$

571  
572  
573

## Microbial pyrite formation

### 574 Supporting Figures

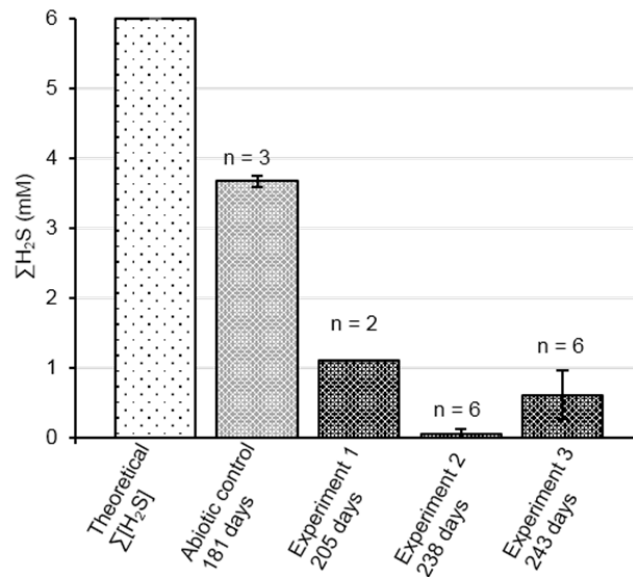

575

576 Figure S1. Total H<sub>2</sub>S as the sum of H<sub>2</sub>S<sub>gaseous</sub>, H<sub>2</sub>S<sub>aqueous</sub>, HS<sup>-</sup>, and S<sup>2-</sup> in the non-inoculated  
577 medium as compared to the abiotic control and enrichment culture J5 in various independent  
578 incubation experiments. The time of incubation is indicated in days. Biological replicates are  
579 indicated as n.

580

### Microbial pyrite formation

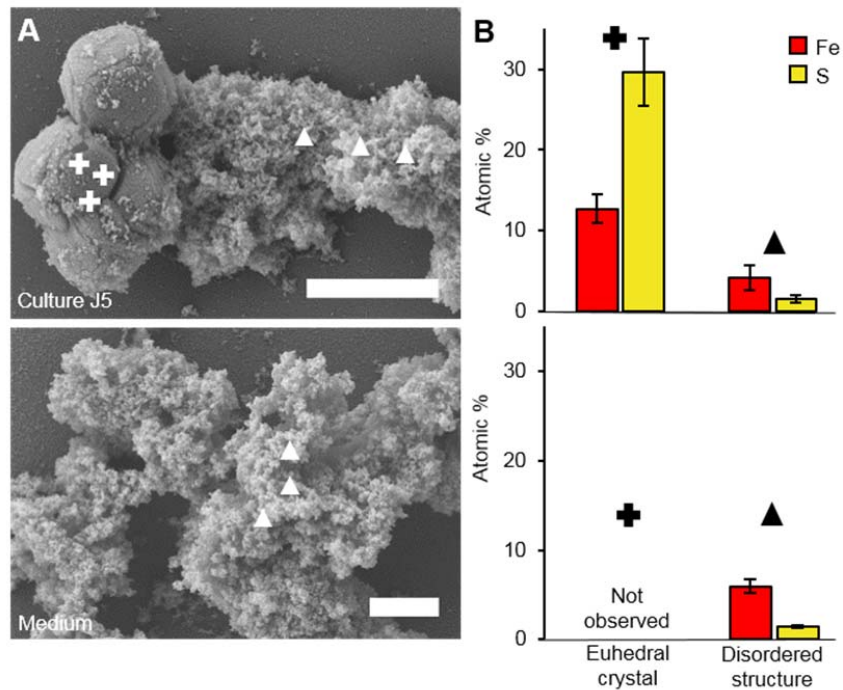

581

582 Figure S2. Fe:S ratio of different mineral phases in culture J5 and freshly prepared medium  
583 without inoculum. (A) Exemplary scanning electron microscopy images used as guidance to  
584 perform energy dispersive X-ray spectroscopy (EDX) point measurements of culture J5 after  
585 nearly 10 months of incubation (295 days) and of freshly prepared medium without inoculum.  
586 Scale bars represent 2  $\mu\text{m}$ . Symbols in the SEM images indicate EDX point measurements  
587 (crosses for crystals, triangles for disordered structure). (B) Atom percent ratio of iron (red) and  
588 sulfur (yellow) as derived from EDX point measurements of euhedral crystals resembling pyrite  
589 as well as disordered structures resembling the sum of the remaining Fe-S-mineral phase.  
590 Measurements were done on eight different sampling areas with three EDX point  
591 measurements each.

592



### Microbial pyrite formation

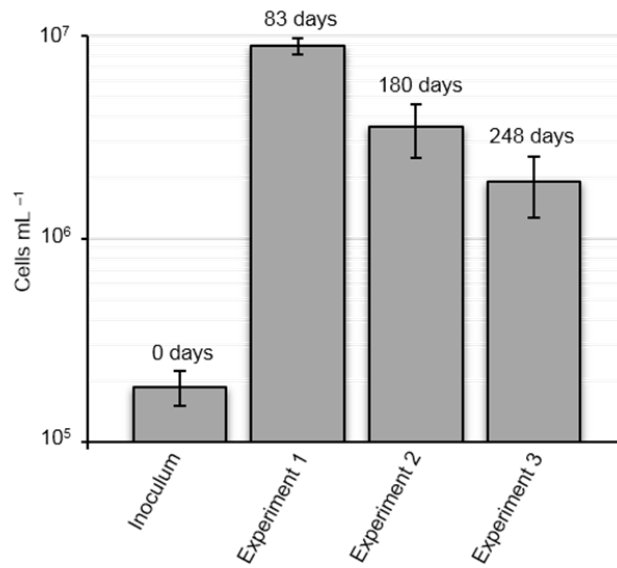

593

594 Figure S3. Average cell counts of culture J5 as based on DAPI-stained cells in three  
595 independent incubation experiments at 28°C as compared to freshly inoculated medium. The  
596 time of incubation is indicated in days. Data was obtained from biological duplicates, each  
597 measured in technical triplicates. Standard deviations are given for technical replicates.

### Microbial pyrite formation

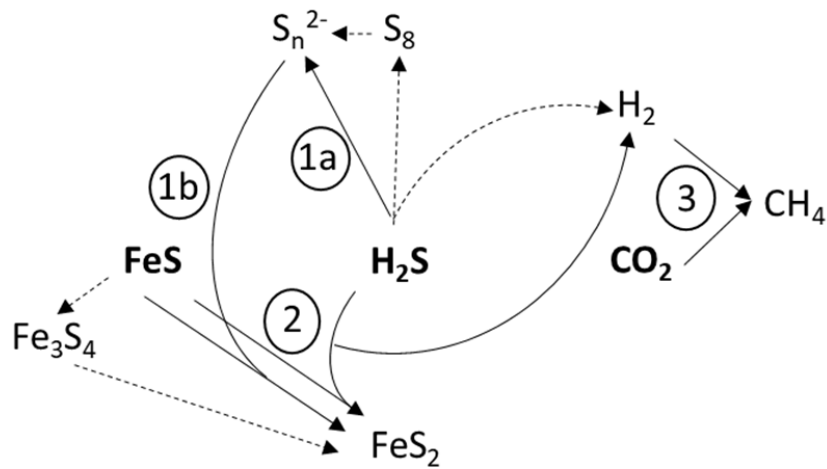

598

599 Figure S4. Schematic overview of potential  $FeS_2$  formation pathways in culture J5. The  
600 scheme illustrates pyrite formation either by a combination of sulfide oxidation to zero-valent  
601 sulfur (1a) coupled to the polysulfide pathway (1b) or by the  $H_2S$  pathway (2). The released  
602 reducing equivalents are likely transferred in the form of  $H_2$  to methanogenesis (3) to reduce  
603  $CO_2$  to  $CH_4$ . Dashed lines leading to *cyclo*-octasulfur ( $S_8$ ) and greigite ( $Fe_3S_4$ ) represent  
604 potential alternative pathways or side reactions, respectively.
